# Supplementary material
Source: Springer Nature journal article supplement (https://www.springermedizin.de/resource/supplementary/13014_2012_750_MOESM3_ESM.pdf/9634002)

A

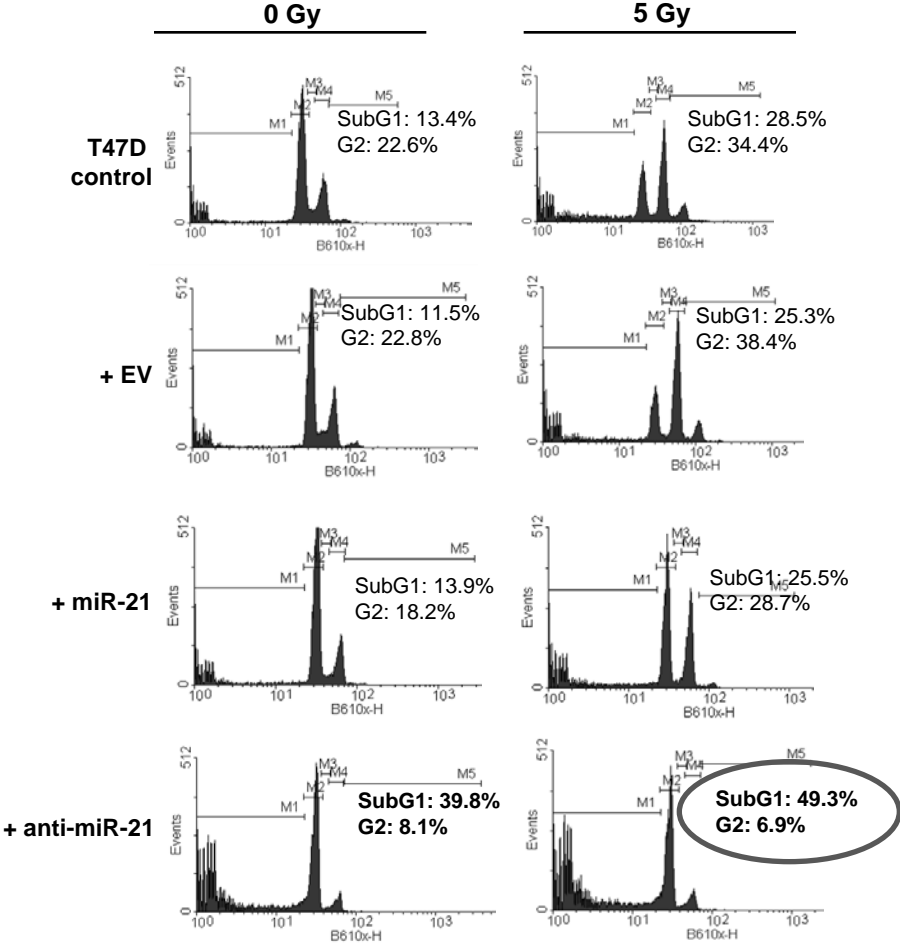

B

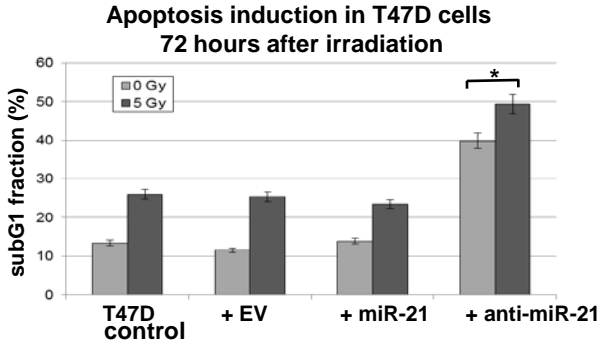

Supplement: MOESM3 [file 9634002]
